# Supplementary material
Source: publisher figshare collection journal article supplement (https://tandf.figshare.com/ndownloader/files/15142043)
Supplement: Supplementary file 1 [file 15142043]

Supplementary material

| **Number(n) of Drugs** | **Drug Combination** | **cases (n)** | **Seizure-free(n)** | **Not**  **seizure- free(n)** |
| --- | --- | --- | --- | --- |
| 1 | CBZ | 2 | 2 | 0 |
| 2 | CBZ/VPA | 2 | 0 | 2 |
| 2 | CBZ/LVT | 4 | 3 | 1 |
| 2 | CBZ/LAC | 1 | 1 | 0 |
| 2 | VPA/LVT | 1 | 1 | 0 |
| 2 | VPA/PHT | 2 | 0 | 2 |
| 2 | VPA/LAC | 1 | 0 | 1 |
| 2 | LVT/LTG | 2 | 1 | 1 |
| 2 | CBZ / VPA | 1 | 0 | 1 |
| 3 | LVT/CBZ/PHT | 1 | 0 | 1 |
| 3 | LVT/CBZ/CLN | 2 | 0 | 2 |
| 3 | LVT/CBZ/LAC | 2 | 1 | 1 |
| 3 | LVT/CBZ/VPA | 1 | 0 | 1 |
| 3 | LVT/VPA/LTG | 1 | 0 | 1 |
| 3 | LVT/VPA/CLN | 2 | 1 | 1 |
| 3 | LVT/VPA/LAC | 1 | 0 | 1 |

Table 1. details of antiepileptic drug combinations and seizure freedom.

CLN: clonazepam, CBZ: carbamazepine, LAC: lacosamide, LTG: lamotrigine, LVT: levetiracetam, PHT: phenytoin, VPA: Valproic acid
